# Supplementary material for: PRMT5 inhibition sensitizes glioblastoma tumor models to temozolomide
Source: Research Square preprint supplement (doi:10.21203/rs.3.rs-5936706/v1), 2025-02-10
Supplement: Supplementary file 1 [file 22205949b810d5f1742d11c0.docx]

**PRMT5 inhibition sensitizes glioblastoma tumor models to temozolomide**

Authors: Shumpei Onishi1#, Sridharan Jayamohan2#, Ashis Chowdhury1, Sarah Rivas1, Yoshihiro Otani3, Sara A. Murphy4, Kimberly A. Rivera Caraballo4, Stuart Walbridge1, Ashish H. Shah1,Bayu Sisay5, Dragan Maric6, Abdel Elkahloun5, Kory Johnson7, John D. Heiss1, Tae Jin Lee3, Sangamesh G. Kumbar8, Desmond A. Brown9, Ji Young Yoo3, A. J. Brenner10, Balveen Kaur4, Gangadhara R. Sareddy2, Yeshavanth Kumar Banasavadi-Siddegowda1*

*1*Surgical Neurology Branch, National Institute of Neurological Disorders and Stroke, National Institutes of Health, Bethesda, MD, USA 2Department of Obstetrics and Gynecology, University of Texas Health San Antonio, San Antonio, TX, USA 3Department of Neurosurgery, University of Texas Health Science Center at Houston, Houston, TX, USA 4Georgia Cancer Center, Augusta University Medical Center, Augusta, GA, USA 5Cancer Genetics Branch, National Human Genome Research Institute, National Institutes of Health, Bethesda, MD, USA. *6* Flow and Imaging Cytometry Core Facility, NINDS, NIH, Bethesda, MD, USA
7Bioinformatics Core, Information Technology Program, NINDS, NIH, Bethesda, MD, USA 8Department of Growth and Development, Colle of Dentistry, University of Nebraska Medical Center, Omaha, NE, USA. 9Neurosurgical Oncology Unit, Surgical Neurology Branch, NINDS, NIH, Bethesda, MD, USA 10Mays Cancer Center at University of Texas Health San Antonio, San Antonio, TX, USA

**Running Title:** LLY-283 enhances the anti-tumor efficacy of temozolomide

# Contributed equally to this article

* **Corresponding Author:** Yeshavanth Kumar Banasavadi-Siddegowda, 10 Center Drive, Room 3D03 Bethesda, MD 20892-1414. Phone: 301-451-0970; E-mail: yesh.banasavadisiddegowda@nih.gov

**Funding:** Supported by the i) Intramural Research Program at the National Institute of Neurological Disorders and Stroke at the NIH, ii) 1R01NS106173-01A1 from NIH to Gangadhara R. Sareddy, iii) R21NS123685 and R01CA276942 from the National Institutes of Health (NIH) to Ji Young Yoo.

**Conflict of Interest Statement:** No conflict of Interest

**Authors’ Contributions**

Conception and design: Y. K. Banasavadi-Siddegowda

Development of methodology: Y.K. Banasavadi-Siddegowda Acquisition of data: S. Onishi, S. Jayamohan, A. Chowdhury, S. Rivas, Y. Otani, S. Murphy, K.A. Rivera-Caraballo, S. Walbridge, B. Sisay, D. Maric, Y.K. Banasavadi-Siddegowda Analysis, and interpretation of data: S. Onishi, S. Jayamohan, A. H. Shah, A. Elkahloun, K. Johnson, J. D. Heiss, T. J. Lee, S. G. Kumbar, D. A. Brown, J.Y. Yoo, A. J. Brenner, B. Kaur, G. R. Sareddy, Y.K. Banasavadi-Siddegowda Writing of manuscript: S. Onishi, Y. K. Banasavadi-Siddegowda


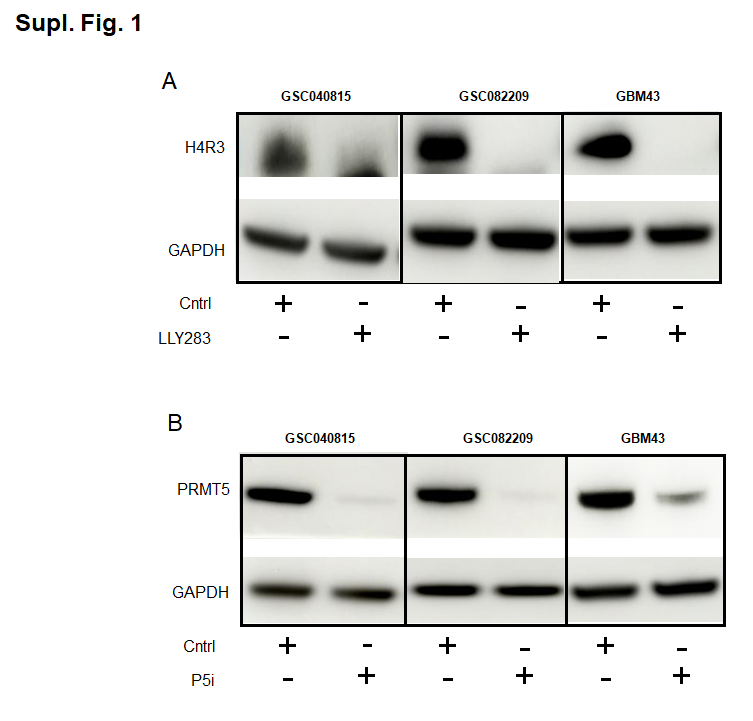


**Supplementary Figure 1:** (A) Indicated GBMNS were treated with LLY283. 3 days post-treatment, cells were collected and probed for PRMT5 marker H4R3 by western blot. (B) GBMNS transfected with scrambled (Cntrl), or PRMT5-target specific siRNA (P5i) were probed for PRMT5 by western blot.


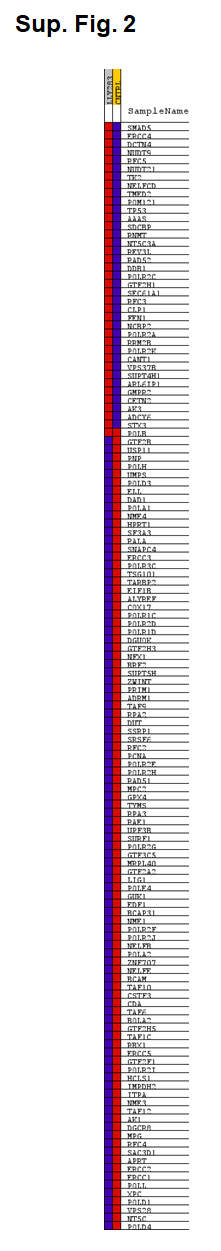


**Supplementary Figure 2:** Heatmap (related to Fig. 3B) showing the expression of DNA damage repair genes in Cntrl and LLY-283 treated GSC082209.


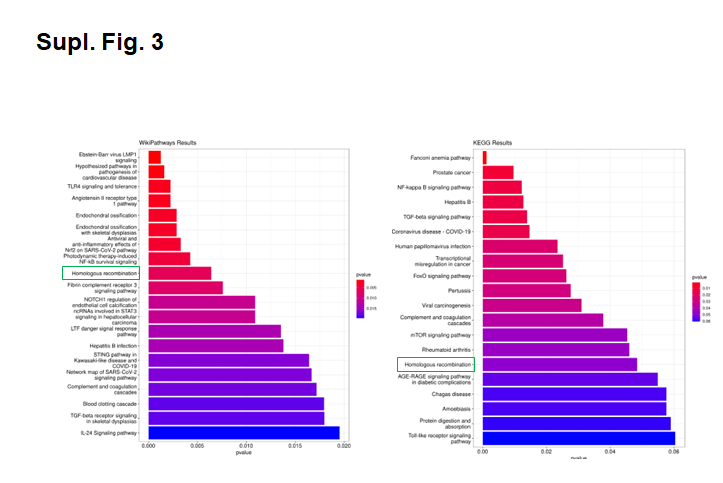


**Supplementary Figure 3:** Top gene ontology terms of differentially expressed genes pointing out HDR through HR.
